# Supplementary material
Source: Springer Nature journal article supplement (https://www.springermedizin.de/resource/supplementary/12958_2008_455_MOESM3_ESM.pdf/9567930)

Pbx2

actin

control

FSH

GDF9 50 ng/ml

GDF9 100 ng/ml

FSH + GDF9 50 ng/ml

FSH + GDF9 100 ng/ml

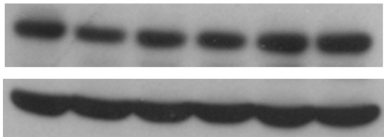

Supplement: MOESM3 [file 9567930]
